# Supplementary material for: Optimizing early child development for young children with non-anemic iron deficiency in the primary care practice setting (OptEC): study protocol for a randomized controlled trial
Source: PubMed Central journal article supplement (PMC4389731; doi:10.1186/s13063-015-0635-z), 2015-04-02
Supplement: 13063_2015_635_MOESM2_ESM.pdf [file 13063_2015_635_MOESM2_ESM.pdf]

**OptEC Trial:** Optimizing early child development in the primary care practice setting:  
Pragmatic randomized trial of iron treatment for young children with non-anemic iron deficiency

**Follow-up Data Collection Form – Data linking sheet**  
**(To be stored separately from study data)**

ID String # \_\_\_\_\_ Date \_\_\_\_\_  
Age \_\_\_\_\_ (months) Child's Sex: Male [ ] Female [ ]  
Home Telephone # \_\_\_\_\_ Work/cell Tel # \_\_\_\_\_  
Name of caregiver interviewed \_\_\_\_\_  
Relationship to child \_\_\_\_\_



- |                                               |     |    |
|-----------------------------------------------|-----|----|
| • Not convinced that it will benefit my child | Yes | No |
| • Too hard to give it                         | Yes | No |
| • Forgot                                      | Yes | No |
| • Other reason(s)                             | Yes | No |

8. Did your child experience any of the following while administering the study drug **(circle all that apply)**?

- |                          |     |    |
|--------------------------|-----|----|
| • Coughing               | Yes | No |
| • Spitting up            | Yes | No |
| • Choking, gagging       | Yes | No |
| • Unhappy with the taste | Yes | No |

9. Did your child experience any of the following during the past 4 months **(circle all that apply)**?

- |                          |     |    |
|--------------------------|-----|----|
| • Staining of the teeth  | Yes | No |
| • Constipation           | Yes | No |
| • Loose stool            | Yes | No |
| • Passage of black stool | Yes | No |

10. Is your child **currently** breastfeeding **(please circle)**?

- Yes
- No — at what age did you stop breastfeeding? \_\_\_\_\_ months
- Not applicable, did not breastfeed

11. Please specify your child's diet for the past 3 days. **Please check all that apply.**

- Breast milk
- Infant formula
- Red meat (beef, veal, pork, lamb, etc.)
- Poultry (chicken, turkey, duck, etc.)
- Fish (salmon, halibut, haddock, cod, tuna, etc.)
- Shellfish (lobster, crab, shrimp, etc.)
- Eggs
- Milk  Skim  1%  2%  Homo
- Fruits
- Vegetables
- Cheese
- Yogurt
- Margarine
- Honey
- Whole grain products (bread, bagel, bun, cereal, pasta, rice, roti, tortillas, etc.)
- Fast Food
- Infant cereal
- Vegetarian: does not eat red meat, poultry, fish or shellfish
- Vegan: does not eat red meat, poultry, fish, shellfish, eggs, dairy or honey

12. Circle how many cups of each drink your child has currently in a typical day. (1 cup = 8 ounces= 250 ml)

|                                            |   |   |   |   |   |   |    |   |    |
|--------------------------------------------|---|---|---|---|---|---|----|---|----|
| Cow's milk                                 | 0 | ½ | 1 | 2 | 3 | 4 | 5+ |   |    |
| Infant formula                             | 0 | ½ | 1 | 2 | 3 | 4 | 5+ |   |    |
| Infant cereal                              | 0 | ¼ | ½ | ¾ | 1 | 2 | 3  | 4 | 5+ |
| Soy milk                                   | 0 | ½ | 1 | 2 | 3 | 4 | 5+ |   |    |
| Other milk (rice, goat etc)                | 0 | ½ | 1 | 2 | 3 | 4 | 5+ |   |    |
| 100% Juice (apple, orange etc)             | 0 | ½ | 1 | 2 | 3 | 4 | 5+ |   |    |
| Sweetened drinks (Kool aid, Sunny D, etc.) | 0 | ½ | 1 | 2 | 3 | 4 | 5+ |   |    |
| Tea                                        | 0 | ½ | 1 | 2 | 3 | 4 | 5+ |   |    |
| Soda or Pop                                | 0 | ½ | 1 | 2 | 3 | 4 | 5+ |   |    |

13. Did your child's diet include the following foods during the last 4 months? **Please check all that apply?**

- Whole grain products (example – iron enriched breakfast cereals, enriched pasta and rice, beans such as chick peas, kidney beans, lentils and canned baked beans)

\_\_\_\_\_ times per \_\_\_\_\_ (day, week, month)

- Tofu \_\_\_\_\_ times per \_\_\_\_\_ (day, week, month)

- Citrus fruits (example - oranges, grapefruit, lemon juice, tomatoes, cantaloupe, kiwi fruit)

\_\_\_\_\_ times per \_\_\_\_\_ (day, week, month)

- Citrus vegetables (example – spinach, cabbage, broccoli, Brussels sprouts, bell pepper, cauliflower)

\_\_\_\_\_ times per \_\_\_\_\_ (day, week, month)

14. Has your child been ill within the **past 4 months?**

- No

- Yes, (complete all that apply below)

- Colds or flus, how many times? \_\_\_\_\_
- Asthma attack, how many times? \_\_\_\_\_
- Pneumonia, how many times? \_\_\_\_\_
- Ear infection, how many times? \_\_\_\_\_

**For office use only**

Height \_\_\_\_\_ cm

Weight \_\_\_\_\_ kg

BMI \_\_\_\_\_ kg/m<sup>2</sup>

Waist circumference \_\_\_\_\_ cm
